# Supplementary material for: A randomized, double-blind, placebo-controlled pilot study of a probiotic in emotional symptoms of chronic fatigue syndrome
Source: Springer Nature journal article supplement (doi:10.1186/1757-4749-1-6), 2009-03-19

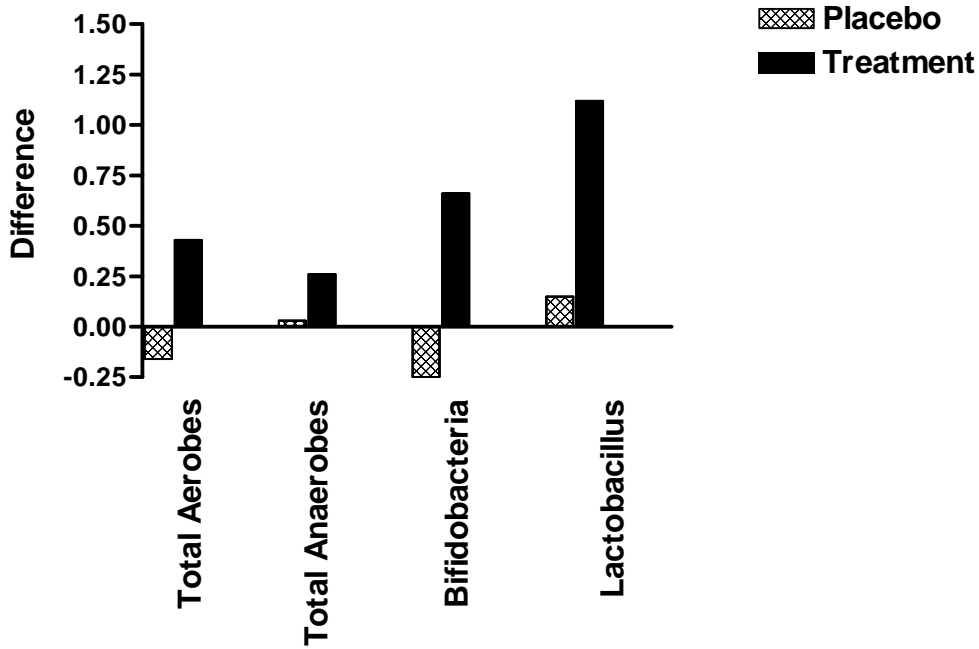

Supplement: 13099_2008_6_MOESM1_ESM.pdf [file 13099_2008_6_MOESM1_ESM.pdf]
